# Supplementary material
Source: PubMed Central journal article supplement (PMC4240987)
Supplement: rspb20141776supp2.pdf [file rspb20141776supp2.pdf]

**Table S1. Genes differentially expressed between *S. invicta* males of different *Gp-9* genotypes.**

| sample type                                             | gene ID      | description                                  | expression ratio <sup>1</sup> | p-value |
|---------------------------------------------------------|--------------|----------------------------------------------|-------------------------------|---------|
| haploid male pupae<br>( <i>B</i> vs. <i>b</i> )         | SI.MKN.02136 | hypothetical protein SINV_13217              | 0.28                          | 0.001   |
|                                                         | SI.MKN.03300 | E3 ubiquitin-protein ligase RFWD2            | 4.88                          | 0.001   |
|                                                         | SI.MKN.02125 | hypothetical protein SINV_01823              | 0.20                          | <0.001  |
|                                                         | SI.MKN.00089 | putative deoxyribonuclease TATDN1            | 0.21                          | 0.002   |
|                                                         | SI.MKN.04391 | ectopic P granules protein 5 homolog         | 0.08                          | <0.001  |
|                                                         | SI.MKN.02136 | hypothetical protein SINV_13217              | 0.28                          | 0.008   |
|                                                         | SI.MKN.02206 | trypsin inhibitor                            | 0.06                          | 0.008   |
| 1-day-old diploid<br>males ( <i>BB</i> vs. <i>Bb</i> )  | SI.MKN.03934 | hypothetical protein SINV_07124              | 0.23                          | 0.001   |
| 11-day-old diploid<br>males ( <i>BB</i> vs. <i>Bb</i> ) | SI.MKN.04583 | piggyBac transposon                          | 0.06                          | 0.001   |
|                                                         | SI.MKN.04055 | cytoplasmic trna 2-thiolation protein 1-like | 0.18                          | 0.007   |

<sup>1</sup> Expression ratio for the first **genotype** relative to the second **genotype**

**Table S3. Number of multiple-clone genes that showed expression differences between clones.**

| <b>developmental stages</b> | <b>comparison between</b> | <b>No. of differentially expressed genes</b> | <b>No. of differentially expressed genes with multiple-clones</b> | <b>No. of genes where there were differences in the direction of expression between clones<sup>1</sup></b> |
|-----------------------------|---------------------------|----------------------------------------------|-------------------------------------------------------------------|------------------------------------------------------------------------------------------------------------|
| <b>pupae</b>                | dM-Qn                     | 57                                           | 46                                                                | <b>1 (2.2%)</b>                                                                                            |
|                             | dM-hM                     | 3048                                         | 1828                                                              | <b>77 (4.2%)</b>                                                                                           |
|                             | hM-Qn                     | 2955                                         | 1783                                                              | <b>78 (4.4%)</b>                                                                                           |
| <b>1d</b>                   | dM-Qn                     | 2413                                         | 1538                                                              | <b>67 (4.4%)</b>                                                                                           |
|                             | dM-hM                     | 358                                          | 226                                                               | <b>0</b>                                                                                                   |
|                             | hM-Qn                     | 2482                                         | 1567                                                              | <b>68 (4.3%)</b>                                                                                           |
| <b>11d</b>                  | dM-Qn                     | 2257                                         | 1386                                                              | <b>44 (3.2%)</b>                                                                                           |
|                             | dM-hM                     | 0                                            | 0                                                                 | <b>0</b>                                                                                                   |
|                             | hM-Qn                     | 2159                                         | 1334                                                              | <b>44 (3.3%)</b>                                                                                           |

<sup>1</sup> Genes were counted only when at least one clone was significantly more expressed in one direction and at least one clone significantly more in the other direction

**Table S4. Primer sequences used for qRT-PCR verification of alternative splicing and expression of the *S. invicta dsx* gene.**

| <b><i>dsx</i> target exon</b> | <b>forward primer</b>    | <b>reverse primer</b>      |
|-------------------------------|--------------------------|----------------------------|
| dsxExon4                      | GTGGAACATACTTGGAGGGAGATG | AATTCCTCGTCCAAGTGATAGGC    |
| dsxExon5                      | GAAAACACTCCAGCCGGAAGATTA | GACATCTTCCTGTTGTTGAACTGG   |
| dsxExon6                      | GCTTCAGAGGAGGCGCCTATTGG  | AGGAAACGGAGATGTACTIONGACGC |
| dsxExon7                      | GAAACTCGCGTCGCCTCCGAAGTG | GCAGTGCTGGCCGTACACCTCGTG   |

**Table S5. Results of Gene Ontology enrichment analysis for comparisons between *S. invicta* individuals of three different categories at three developmental timepoints (all FDR < 0.05). GO categories that are significantly over-represented in multiple comparisons for a given timepoint are highlighted in bold.**

| category          | comparison <sup>1</sup> | direction of differential expression <sup>2</sup> | GO category <sup>3</sup>                         | GO identifier                                   | GO term description                              | annotated                                       | significant      | expected         | p-value          |                  |
|-------------------|-------------------------|---------------------------------------------------|--------------------------------------------------|-------------------------------------------------|--------------------------------------------------|-------------------------------------------------|------------------|------------------|------------------|------------------|
| pupae             | dM-Qn                   | up                                                | ---                                              | ---                                             | ---                                              | ---                                             | ---              | ---              | none significant |                  |
|                   |                         | down                                              | ---                                              | ---                                             | ---                                              | ---                                             | ---              | ---              | none significant |                  |
|                   | hM-dM                   | up                                                | BP                                               | ---                                             | ---                                              | ---                                             | ---              | ---              | ---              | none significant |
|                   |                         |                                                   | CC                                               | ---                                             | ---                                              | ---                                             | ---              | ---              | ---              | none significant |
|                   |                         | MF                                                | <b>GO:0051082</b>                                | <b>unfolded protein binding</b>                 | <b>39</b>                                        | <b>25</b>                                       | <b>12.64</b>     | <b>0.068</b>     |                  |                  |
|                   |                         | down                                              | BP                                               | <b>GO:0042254</b>                               | <b>ribosome biogenesis</b>                       | <b>131</b>                                      | <b>73</b>        | <b>33.98</b>     | <b>&lt;0.001</b> |                  |
|                   |                         |                                                   |                                                  | <b>GO:0006412</b>                               | <b>translation</b>                               | <b>233</b>                                      | <b>103</b>       | <b>60.44</b>     | <b>&lt;0.001</b> |                  |
|                   |                         |                                                   | CC                                               | <b>GO:0005840</b>                               | <b>ribosome</b>                                  | <b>206</b>                                      | <b>97</b>        | <b>53.81</b>     | <b>&lt;0.001</b> |                  |
|                   |                         |                                                   |                                                  | GO:0005811                                      | lipid particle                                   | 70                                              | 34               | 18.29            | 0.013            |                  |
|                   |                         | GO:0022627                                        | cytosolic small ribosomal subunit                | 13                                              | 10                                               | 3.4                                             | 0.043            |                  |                  |                  |
|                   |                         | GO:0005578                                        | proteinaceous extracellular matrix               | 8                                               | 7                                                | 2.09                                            | 0.091            |                  |                  |                  |
|                   |                         | MF                                                | <b>GO:0003735</b>                                | <b>structural constituent of ribosome</b>       | <b>111</b>                                       | <b>73</b>                                       | <b>27.61</b>     | <b>&lt;0.001</b> |                  |                  |
|                   | hM-Qn                   | up                                                | BP                                               | GO:0006457                                      | protein folding                                  | 63                                              | 37               | 19.98            | 0.030            |                  |
|                   |                         |                                                   | CC                                               | ---                                             | ---                                              | ---                                             | ---              | ---              | none significant |                  |
| MF                |                         | <b>GO:0051082</b>                                 | <b>unfolded protein binding</b>                  | <b>39</b>                                       | <b>26</b>                                        | <b>12.19</b>                                    | <b>0.008</b>     |                  |                  |                  |
| down              |                         | BP                                                | <b>GO:0042254</b>                                | <b>ribosome biogenesis</b>                      | <b>131</b>                                       | <b>73</b>                                       | <b>32.1</b>      | <b>&lt;0.001</b> |                  |                  |
|                   |                         |                                                   | <b>GO:0006412</b>                                | <b>translation</b>                              | <b>233</b>                                       | <b>107</b>                                      | <b>57.1</b>      | <b>&lt;0.001</b> |                  |                  |
|                   |                         | CC                                                | <b>GO:0005840</b>                                | <b>ribosome</b>                                 | <b>206</b>                                       | <b>99</b>                                       | <b>50.92</b>     | <b>&lt;0.001</b> |                  |                  |
|                   |                         |                                                   | GO:0022627                                       | cytosolic small ribosomal subunit               | 13                                               | 12                                              | 3.21             | <0.001           |                  |                  |
|                   | GO:0005578              | proteinaceous extracellular matrix                | 8                                                | 7                                               | 1.98                                             | 0.082                                           |                  |                  |                  |                  |
|                   | MF                      | <b>GO:0003735</b>                                 | <b>structural constituent of ribosome</b>        | <b>111</b>                                      | <b>76</b>                                        | <b>26.16</b>                                    | <b>&lt;0.001</b> |                  |                  |                  |
| 1-day-old adults  | dM-Qn                   | up                                                | BP                                               | GO:0015992                                      | proton transport                                 | 71                                              | 50               | 15.69            | <0.001           |                  |
|                   |                         |                                                   |                                                  | GO:0006120                                      | mitochondrial electron transport, NADH to        | 22                                              | 21               | 4.86             | <0.001           |                  |
|                   |                         |                                                   |                                                  | GO:0006744                                      | ubiquinone biosynthetic process                  | 24                                              | 22               | 5.3              | <0.001           |                  |
|                   |                         |                                                   |                                                  | GO:0042254                                      | ribosome biogenesis                              | 131                                             | 59               | 28.94            | <0.001           |                  |
|                   |                         |                                                   |                                                  | GO:0006412                                      | translation                                      | 214                                             | 82               | 47.28            | <0.001           |                  |
|                   |                         |                                                   |                                                  | GO:0006814                                      | sodium ion transport                             | 32                                              | 21               | 7.07             | <0.001           |                  |
|                   |                         |                                                   |                                                  | GO:0015986                                      | ATP synthesis coupled proton transport           | 18                                              | 12               | 3.98             | 0.036            |                  |
|                   |                         |                                                   |                                                  | GO:0005747                                      | mitochondrial respiratory chain complex I        | 12                                              | 11               | 2.74             | <0.001           |                  |
|                   |                         |                                                   |                                                  | GO:0005840                                      | ribosome                                         | 206                                             | 84               | 47.04            | <0.001           |                  |
|                   |                         |                                                   |                                                  | GO:0005739                                      | mitochondrion                                    | 216                                             | 100              | 49.33            | 0.005            |                  |
|                   |                         |                                                   |                                                  | GO:0022625                                      | cytosolic large ribosomal subunit                | 7                                               | 7                | 1.6              | 0.006            |                  |
|                   |                         | GO:0005743                                        | mitochondrial inner membrane                     | 71                                              | 44                                               | 16.21                                           | 0.012            |                  |                  |                  |
|                   |                         | GO:0070469                                        | respiratory chain                                | 36                                              | 29                                               | 8.22                                            | 0.013            |                  |                  |                  |
|                   |                         | GO:0000276                                        | mitochondrial proton-transporting ATP synthase   | 6                                               | 6                                                | 1.37                                            | 0.014            |                  |                  |                  |
|                   |                         | MF                                                | <b>GO:0008137</b>                                | <b>NADH dehydrogenase (ubiquinone) activity</b> | <b>22</b>                                        | <b>21</b>                                       | <b>4.73</b>      | <b>&lt;0.001</b> |                  |                  |
|                   |                         |                                                   | <b>GO:0003735</b>                                | <b>structural constituent of ribosome</b>       | <b>111</b>                                       | <b>58</b>                                       | <b>23.87</b>     | <b>&lt;0.001</b> |                  |                  |
|                   |                         | down                                              | ---                                              | ---                                             | ---                                              | ---                                             | ---              | ---              | none significant |                  |
|                   | hM-dM                   | up                                                | ---                                              | ---                                             | ---                                              | ---                                             | ---              | ---              | ---              | none significant |
|                   |                         | down                                              | ---                                              | ---                                             | ---                                              | ---                                             | ---              | ---              | ---              | none significant |
|                   | hM-Qn                   | up                                                | BP                                               | GO:0015992                                      | proton transport                                 | 71                                              | 46               | 17.34            | <0.001           |                  |
|                   |                         |                                                   |                                                  | GO:0006120                                      | mitochondrial electron transport, NADH to        | 22                                              | 17               | 5.37             | <0.001           |                  |
|                   |                         |                                                   |                                                  | GO:0006744                                      | ubiquinone biosynthetic process                  | 24                                              | 16               | 5.86             | 0.013            |                  |
|                   |                         |                                                   | GO:0042254                                       | ribosome biogenesis                             | 131                                              | 54                                              | 31.99            | 0.013            |                  |                  |
|                   |                         | MF                                                | <b>GO:0008137</b>                                | <b>NADH dehydrogenase (ubiquinone) activity</b> | <b>22</b>                                        | <b>18</b>                                       | <b>5.13</b>      | <b>&lt;0.001</b> |                  |                  |
|                   |                         |                                                   | <b>GO:0003735</b>                                | <b>structural constituent of ribosome</b>       | <b>111</b>                                       | <b>52</b>                                       | <b>25.89</b>     | <b>&lt;0.001</b> |                  |                  |
| down              |                         | ---                                               | ---                                              | ---                                             | ---                                              | ---                                             | ---              | ---              | none significant |                  |
| 11-day-old adults | dM-Qn                   | up                                                | BP                                               | GO:0015992                                      | proton transport                                 | 71                                              | 53               | 14.2             | <0.001           |                  |
|                   |                         |                                                   |                                                  | GO:0006120                                      | mitochondrial electron transport, NADH to        | 22                                              | 20               | 4.4              | <0.001           |                  |
|                   |                         |                                                   |                                                  | GO:0006744                                      | ubiquinone biosynthetic process                  | 24                                              | 19               | 4.8              | <0.001           |                  |
|                   |                         |                                                   |                                                  | GO:0006814                                      | sodium ion transport                             | 32                                              | 21               | 6.4              | <0.001           |                  |
|                   |                         |                                                   |                                                  | GO:0015986                                      | ATP synthesis coupled proton transport           | 18                                              | 15               | 3.6              | <0.001           |                  |
|                   |                         |                                                   |                                                  | GO:0005747                                      | mitochondrial respiratory chain complex I        | 12                                              | 11               | 2.52             | <0.001           |                  |
|                   |                         |                                                   |                                                  | GO:0005739                                      | mitochondrion                                    | 216                                             | 104              | 45.38            | <0.001           |                  |
|                   |                         |                                                   |                                                  | GO:0005743                                      | mitochondrial inner membrane                     | 71                                              | 44               | 14.92            | 0.005            |                  |
|                   |                         |                                                   |                                                  | GO:0070469                                      | respiratory chain                                | 36                                              | 30               | 7.56             | 0.012            |                  |
|                   |                         |                                                   |                                                  | GO:0000276                                      | mitochondrial proton-transporting ATP synthase   | 6                                               | 6                | 1.26             | 0.012            |                  |
|                   |                         |                                                   |                                                  | MF                                              | <b>GO:0008137</b>                                | <b>NADH dehydrogenase (ubiquinone) activity</b> | <b>22</b>        | <b>19</b>        | <b>4.35</b>      | <b>&lt;0.001</b> |
|                   |                         | GO:0004129                                        | cytochrome-c oxidase activity                    | 16                                              | 11                                               | 3.16                                            | 0.021            |                  |                  |                  |
|                   |                         | GO:0046933                                        | hydrogen ion transporting ATP synthase activity, | 12                                              | 9                                                | 2.37                                            | 0.024            |                  |                  |                  |
|                   |                         | GO:0046961                                        | proton-transporting ATPase activity, rotational  | 10                                              | 8                                                | 1.98                                            | 0.024            |                  |                  |                  |
|                   |                         | GO:0008121                                        | ubiquinol-cytochrome-c reductase activity        | 8                                               | 7                                                | 1.58                                            | 0.024            |                  |                  |                  |
|                   |                         | <b>GO:0003735</b>                                 | <b>structural constituent of ribosome</b>        | <b>111</b>                                      | <b>38</b>                                        | <b>21.93</b>                                    | <b>0.049</b>     |                  |                  |                  |
|                   | down                    | ---                                               | ---                                              | ---                                             | ---                                              | ---                                             | ---              | ---              | none significant |                  |
| hM-dM             | up                      | ---                                               | ---                                              | ---                                             | ---                                              | ---                                             | ---              | ---              | none significant |                  |
|                   | down                    | ---                                               | ---                                              | ---                                             | ---                                              | ---                                             | ---              | ---              | none significant |                  |
| hM-Qn             | up                      | BP                                                | GO:0015992                                       | proton transport                                | 71                                               | 48                                              | 13.68            | <0.001           |                  |                  |
|                   |                         |                                                   | GO:0006120                                       | mitochondrial electron transport, NADH to       | 22                                               | 20                                              | 4.24             | <0.001           |                  |                  |
|                   |                         |                                                   | GO:0006744                                       | ubiquinone biosynthetic process                 | 24                                               | 20                                              | 4.62             | <0.001           |                  |                  |
|                   |                         |                                                   | GO:0006814                                       | sodium ion transport                            | 32                                               | 20                                              | 6.16             | <0.001           |                  |                  |
|                   |                         |                                                   | GO:0042254                                       | ribosome biogenesis                             | 131                                              | 44                                              | 25.24            | 0.040            |                  |                  |
|                   |                         |                                                   | CC                                               | <b>GO:0005747</b>                               | <b>mitochondrial respiratory chain complex I</b> | <b>12</b>                                       | <b>10</b>        | <b>2.46</b>      | <b>0.004</b>     |                  |
|                   |                         |                                                   | GO:0005739                                       | mitochondrion                                   | 216                                              | 96                                              | 44.27            | 0.013            |                  |                  |
|                   |                         |                                                   | GO:0070469                                       | respiratory chain                               | 36                                               | 28                                              | 7.38             | 0.013            |                  |                  |
|                   |                         |                                                   | GO:0000276                                       | mitochondrial proton-transporting ATP synthase  | 6                                                | 6                                               | 1.23             | 0.013            |                  |                  |
|                   |                         |                                                   | GO:0005763                                       | mitochondrial small ribosomal subunit           | 10                                               | 8                                               | 2.05             | 0.013            |                  |                  |
|                   |                         |                                                   | GO:0005743                                       | mitochondrial inner membrane                    | 71                                               | 41                                              | 14.55            | 0.019            |                  |                  |
|                   | MF                      | <b>GO:0008137</b>                                 | <b>NADH dehydrogenase (ubiquinone) activity</b>  | <b>22</b>                                       | <b>19</b>                                        | <b>4.2</b>                                      | <b>&lt;0.001</b> |                  |                  |                  |
|                   |                         | <b>GO:0003735</b>                                 | <b>structural constituent of ribosome</b>        | <b>111</b>                                      | <b>44</b>                                        | <b>21.21</b>                                    | <b>&lt;0.001</b> |                  |                  |                  |
|                   |                         | <b>GO:0008121</b>                                 | <b>ubiquinol-cytochrome-c reductase activity</b> | <b>8</b>                                        | <b>7</b>                                         | <b>1.53</b>                                     | <b>0.031</b>     |                  |                  |                  |
|                   | down                    | ---                                               | ---                                              | ---                                             | ---                                              | ---                                             | ---              | ---              | none significant |                  |

<sup>1</sup>dM = diploid male, hM = haploid male, Qn = queen.

<sup>2</sup>Direction of expression difference (up- or down-regulated) for the first category in the pairwise listing relative to the second category.

<sup>3</sup>Abbreviations for GO categories are as follows: BP = Biological process, CC = Cellular component, MF = Molecular function.

**Table S6. Expression level (RPKM, Reads Per Kilobase per Million mapped reads with standard deviations) for each exon of the *dsx* gene in adult queens and adult haploid males of *S. invicta* based on unpublished RNAseq data.**

| exon  | mean RPKM         |                  |
|-------|-------------------|------------------|
|       | males             | queens           |
| Exon1 | 16.39 (+/- 1.85)  | 27.16 (+/- 5.71) |
| Exon2 | 40.59 (+/- 2.04)  | 36.45 (+/-12.97) |
| Exon3 | 67.04 (+/-14.82)  | 63.87 (+/-33.15) |
| Exon4 | 29.65 (+/- 8.58)  | 22.81 (+/-10.17) |
| Exon5 | 2.15 (+/- 1.39)   | 13.91 (+/- 3.30) |
| Exon6 | 18.47 (+/- 5.44)  | 2.13 (+/- 1.48)  |
| Exon7 | 105.78 (+/- 6.26) | 6.64 (+/- 2.45)  |

**Table S7. Expression of 12 genes implicated in sperm production in *S. invicta* pupae.** Expression ratios and *p*-values in bold denote ratios that are significantly different from one ( $p < 0.01$ ).

| No. | gene ID      | description                                            | spot ID                   | expression ratio <sup>1</sup> |             |             | <i>p</i> -value |                  |                  |
|-----|--------------|--------------------------------------------------------|---------------------------|-------------------------------|-------------|-------------|-----------------|------------------|------------------|
|     |              |                                                        |                           | dM/Qn                         | hM/dM       | hM/Qn       | Qn-dM           | dM-hM            | hM-Qn            |
| 1   | SI.MKN.02316 | testis-specific serine threonine-protein kinase-like   | SiJWE11BAA_pcr_2          | 1.0                           | <b>33.3</b> | <b>31.8</b> | 0.931           | <b>&lt;0.001</b> | <b>&lt;0.001</b> |
| 2   | SI.MKN.03583 | testis-specific serine threonine-protein kinase 1-like | SiJWD07BCZ_pcr_1          | 1.0                           | <b>22.6</b> | <b>23.2</b> | 0.961           | <b>&lt;0.001</b> | <b>&lt;0.001</b> |
| 3   | SI.MKN.03943 | testis skeletal muscle dual specificity phosphatase    | SiJWC02ABH_pcr_2          | 1.0                           | <b>1.5</b>  | <b>1.5</b>  | 0.980           | <b>0.002</b>     | <b>0.003</b>     |
| 4   | SI.MKN.02503 | sperm flagellar protein 1                              | SiJWG03ADE_pcr_1          | 1.2                           | <b>11.0</b> | <b>13.5</b> | 0.510           | <b>&lt;0.001</b> | <b>&lt;0.001</b> |
| 5   | SI.MKN.05070 | outer dense fiber protein 3                            | SiJWE08BDF_pcr_1          | 1.1                           | <b>4.2</b>  | <b>4.5</b>  | 0.762           | <b>&lt;0.001</b> | <b>&lt;0.001</b> |
| 6   | SI.MKN.00746 | sperm surface protein sp17                             | SiJWC07BAD_pcr_1          | 0.9                           | <b>1.5</b>  | <b>1.3</b>  | 0.407           | <b>&lt;0.001</b> | <b>0.008</b>     |
| 7   | SI.MKN.00816 | motile sperm domain containing 1                       | SiJWC02ADS_pcr_1          | 1.0                           | <b>1.5</b>  | <b>1.6</b>  | 0.754           | <b>&lt;0.001</b> | <b>&lt;0.001</b> |
|     |              |                                                        | SiJWE11ABC_pcr_2          | 1.2                           | <b>1.4</b>  | <b>1.7</b>  | 0.237           | <b>0.001</b>     | <b>&lt;0.001</b> |
|     |              |                                                        | SiJWE05ACI_pcr_2          | 1.2                           | <b>1.3</b>  | <b>1.5</b>  | 0.262           | <b>0.005</b>     | <b>&lt;0.001</b> |
| 8   | SI.MKN.00821 | spermatogenesis-associated protein 17                  | SiJWE10ACS_pcr_2          | 1.5                           | <b>2.5</b>  | <b>3.7</b>  | 0.053           | <b>&lt;0.001</b> | <b>&lt;0.001</b> |
|     |              |                                                        | SiJWE10ACS_pcr_1          | 1.4                           | <b>3.0</b>  | <b>4.2</b>  | 0.228           | <b>&lt;0.001</b> | <b>&lt;0.001</b> |
| 9   | SI.MKN.02084 | spermatogenesis-associated protein 20                  | SiJWC10ACY_pcr_1          | 1.1                           | <b>2.6</b>  | <b>2.8</b>  | 0.692           | <b>&lt;0.001</b> | <b>&lt;0.001</b> |
|     |              |                                                        | SiJWC07ADY_pcr_newprimers | 1.0                           | <b>1.3</b>  | <b>1.3</b>  | 0.992           | <b>&lt;0.001</b> | <b>&lt;0.001</b> |
|     |              |                                                        | SiJWC07ABG_pcr_2          | 1.0                           | <b>1.3</b>  | <b>1.3</b>  | 0.991           | <b>&lt;0.001</b> | <b>&lt;0.001</b> |
| 10  | SI.MKN.05000 | nuclear autoantigenic sperm protein                    | SiJWC03ACE_pcr_2          | 1.2                           | <b>2.9</b>  | <b>3.6</b>  | 0.562           | <b>&lt;0.001</b> | <b>&lt;0.001</b> |
| 11  | SI.MKN.03704 | peroxisomal n-acetyl-spermine spermidine oxidase-like  | SiJWF04BAE_pcr_1          | 1.1                           | <b>2.5</b>  | <b>2.7</b>  | 0.779           | <b>&lt;0.001</b> | <b>&lt;0.001</b> |
| 12  | SI.MKN.03504 | accessory gland protein                                | SiJWC09CAL_pcr_1          | 1.1                           | <b>1.9</b>  | <b>2.1</b>  | 0.762           | <b>&lt;0.001</b> | <b>&lt;0.001</b> |
|     |              |                                                        | SiJWA07AAX_pcr_2          | 1.0                           | <b>1.7</b>  | <b>1.8</b>  | 0.846           | <b>&lt;0.001</b> | <b>&lt;0.001</b> |
|     |              |                                                        | SiJWC12ACX_pcr_1          | 1.0                           | <b>1.6</b>  | <b>1.6</b>  | 0.984           | <b>&lt;0.001</b> | <b>&lt;0.001</b> |
|     |              |                                                        | SiJWA07AAX_pcr_1          | 1.0                           | <b>1.8</b>  | <b>1.8</b>  | 0.917           | <b>&lt;0.001</b> | <b>&lt;0.001</b> |

<sup>1</sup> Expression ratio for the first category relative to the second category, dM = diploid male, hM = haploid male, Qn = queen.

**Table S8. Expression of 49 genes implicated in pheromone production/perception in *S. invicta* pupae.** Expression ratios and *p*-values in bold denote ratios that are significantly different from one ( $p < 0.01$ ).

| No. | gene ID                   | description                                                       | spot ID          | expression ratio <sup>1</sup> |             |             | <i>p</i> -value |                |                |
|-----|---------------------------|-------------------------------------------------------------------|------------------|-------------------------------|-------------|-------------|-----------------|----------------|----------------|
|     |                           |                                                                   |                  | dM/Qn                         | hM/dM       | hM/Qn       | Qn-dM           | dM-hM          | hM-Qn          |
| 1   | SI.MKN.00418              | brain chitinase and chia; probable chitinase 3-like               | SiJWA11CAR_pcr_1 | 0.69                          | <b>0.39</b> | <b>0.27</b> | 0.129           | < <b>0.001</b> | < <b>0.001</b> |
|     |                           |                                                                   | SiJWB08BBP_pcr_1 | 0.83                          | <b>0.47</b> | <b>0.39</b> | 0.475           | < <b>0.001</b> | < <b>0.001</b> |
|     |                           |                                                                   | SiJWC06ACG_pcr_2 | 0.81                          | <b>0.66</b> | <b>0.54</b> | 0.366           | <b>0.003</b>   | < <b>0.001</b> |
|     |                           |                                                                   | SiJWE09CAL_pcr_1 | 0.75                          | <b>0.40</b> | <b>0.30</b> | 0.350           | < <b>0.001</b> | < <b>0.001</b> |
|     |                           |                                                                   | SiJWF09BBO_pcr_1 | 0.62                          | <b>0.39</b> | <b>0.24</b> | 0.129           | < <b>0.001</b> | < <b>0.001</b> |
| 2   | SI.MKN.01261              | chitinase                                                         | SiJWC02BDN_pcr_1 | 0.89                          | <b>0.48</b> | <b>0.43</b> | 0.857           | <b>0.009</b>   | <b>0.003</b>   |
| 3   | SI.MKN.01705              | chitin deacetylase 4                                              | SiJWD02ABJ_pcr_2 | 0.86                          | 0.75        | <b>0.65</b> | 0.488           | 0.021          | < <b>0.001</b> |
|     |                           |                                                                   | SiJWH08CAK_pcr_1 | 1.03                          | <b>0.49</b> | <b>0.50</b> | 0.967           | <b>0.001</b>   | <b>0.002</b>   |
|     |                           |                                                                   | SiJWH12ADT_pcr_1 | 0.83                          | 0.74        | <b>0.62</b> | 0.485           | 0.038          | <b>0.001</b>   |
| 4   | SI.MKN.03920              | chito-oligosaccharidolytic beta-n-acetylglucosaminidase           | SiJWH07ACS_pcr_1 | 0.82                          | <b>2.36</b> | <b>1.94</b> | 0.454           | < <b>0.001</b> | < <b>0.001</b> |
|     |                           |                                                                   | SiJWH07ACS_pcr_2 | 1.24                          | <b>3.46</b> | <b>4.28</b> | 0.597           | <b>0.002</b>   | < <b>0.001</b> |
| 5   | SI.MKN.01859              | cuticle protein                                                   | SiJWD06BDX_pcr_1 | 1.11                          | <b>0.71</b> | 0.78        | 0.646           | <b>0.002</b>   | 0.033          |
|     |                           |                                                                   | SiJWG02ABJ_pcr_2 | 0.92                          | <b>0.38</b> | <b>0.35</b> | 0.800           | < <b>0.001</b> | < <b>0.001</b> |
| 6   | SI.MKN.02972              | cuticular protein hypothetical 28 precursor                       | SiJWB05ACB_pcr_2 | 1.22                          | <b>0.57</b> | 0.69        | 0.545           | <b>0.002</b>   | 0.041          |
|     |                           |                                                                   | SiJWC02BAO_pcr_1 | 1.41                          | <b>0.47</b> | 0.67        | 0.305           | < <b>0.001</b> | 0.048          |
|     |                           |                                                                   | SiJWC06ACT_pcr_2 | 1.31                          | <b>0.50</b> | 0.66        | 0.455           | <b>0.001</b>   | 0.044          |
|     |                           |                                                                   | SiJWG04BAJ_pcr_2 | 1.23                          | <b>0.45</b> | <b>0.55</b> | 0.577           | < <b>0.001</b> | <b>0.003</b>   |
|     |                           |                                                                   | SiJWG10ABN_pcr_2 | 1.12                          | <b>0.53</b> | <b>0.59</b> | 0.768           | <b>0.001</b>   | <b>0.006</b>   |
|     |                           |                                                                   | SiJWH09ABN_pcr_2 | 1.27                          | <b>0.48</b> | 0.61        | 0.545           | < <b>0.001</b> | 0.021          |
| 7   | SI.MKN.03418              | larval cuticle protein a2b                                        | SiJWD08ADG_pcr_1 | 1.03                          | <b>1.81</b> | <b>1.86</b> | 0.953           | < <b>0.001</b> | < <b>0.001</b> |
| 8   | SI.MKN.00858              | chondroitin sulfate synthase 2-like                               | SiJWH06ABU_pcr_2 | 0.97                          | <b>1.55</b> | <b>1.50</b> | 0.915           | < <b>0.001</b> | < <b>0.001</b> |
| 9   | SI.MKN.01933 <sup>2</sup> | endocuticle structural glycoprotein bd-1                          | SiJWB08BCB_pcr_1 | <b>0.35</b>                   | <b>0.43</b> | <b>0.15</b> | <b>0.008</b>    | <b>0.002</b>   | < <b>0.001</b> |
|     |                           |                                                                   | SiJWB08ACP_pcr_2 | <b>0.42</b>                   | 0.62        | <b>0.26</b> | <b>0.009</b>    | 0.035          | < <b>0.001</b> |
|     |                           |                                                                   | SiJWG09CAN_pcr_1 | 0.44                          | 0.48        | <b>0.21</b> | 0.057           | 0.012          | < <b>0.001</b> |
| 10  | SI.MKN.00488              | acyl-delta desaturase                                             | SiJWE01ADR_pcr_1 | 1.28                          | <b>1.33</b> | <b>1.71</b> | 0.306           | <b>0.048</b>   | < <b>0.001</b> |
|     |                           |                                                                   | SiJWG02CAJ_pcr_1 | 1.62                          | <b>2.07</b> | <b>3.36</b> | 0.144           | < <b>0.001</b> | < <b>0.001</b> |
| 11  | SI.MKN.03643              | elongation of very long chain fatty acids protein 4               | SiJWC04ABJ_pcr_2 | 0.82                          | <b>0.76</b> | <b>0.63</b> | 0.162           | <b>0.003</b>   | < <b>0.001</b> |
| 12  | SI.MKN.04235              | elongation of very long chain fatty acids protein aael008004-like | SiJWE01BCA_pcr_1 | 0.92                          | <b>3.88</b> | <b>3.57</b> | 0.748           | < <b>0.001</b> | < <b>0.001</b> |
|     |                           |                                                                   | SiJWF05BCY_pcr_1 | 0.99                          | <b>3.50</b> | <b>3.45</b> | 0.976           | < <b>0.001</b> | < <b>0.001</b> |
|     |                           |                                                                   | SiJWF06CAU_pcr_1 | 1.02                          | <b>4.73</b> | <b>4.81</b> | 0.978           | < <b>0.001</b> | < <b>0.001</b> |
|     |                           |                                                                   | SiJWG09ACJ_pcr_2 | 1.04                          | <b>4.03</b> | <b>4.21</b> | 0.905           | < <b>0.001</b> | < <b>0.001</b> |
|     |                           |                                                                   | SiJWH07BCW_pcr_1 | 0.84                          | <b>3.37</b> | <b>2.82</b> | 0.583           | < <b>0.001</b> | < <b>0.001</b> |

<sup>1</sup> Expression ratio for the first category relative to the second category, dM = diploid male, hM = haploid male, Qn = queen.

<sup>2</sup> Genes that were both ploidy- and sex-specific.

<sup>3</sup> Possible alternatively spliced variants.

**Table S8.** (Continued)

| No. | gene ID                   | description                                           | spot ID                                               | expression ratio <sup>1</sup> |             |             | p-value      |                |                |                |
|-----|---------------------------|-------------------------------------------------------|-------------------------------------------------------|-------------------------------|-------------|-------------|--------------|----------------|----------------|----------------|
|     |                           |                                                       |                                                       | dM/Qn                         | hM/dM       | hM/Qn       | Qn-dM        | dM-hM          | hM-Qn          |                |
| 13  | SI.MKN.00534              | fatty acid binding protein                            | SiJWA10BCT_pcr_1                                      | 0.92                          | <b>0.54</b> | <b>0.50</b> | 0.665        | < <b>0.001</b> | < <b>0.001</b> |                |
|     |                           |                                                       | SiJWB01BCJ_pcr_1                                      | 0.96                          | <b>0.49</b> | <b>0.47</b> | 0.846        | < <b>0.001</b> | < <b>0.001</b> |                |
|     |                           |                                                       | SiJWB12BAJ_pcr_2                                      | 0.99                          | <b>0.47</b> | <b>0.47</b> | 0.961        | < <b>0.001</b> | < <b>0.001</b> |                |
|     |                           |                                                       | SiJWF05BDY_pcr_1                                      | 0.91                          | <b>0.61</b> | <b>0.55</b> | 0.592        | < <b>0.001</b> | < <b>0.001</b> |                |
|     |                           |                                                       | SiJWH04BBF_pcr_1                                      | 0.97                          | <b>0.49</b> | <b>0.47</b> | 0.897        | < <b>0.001</b> | < <b>0.001</b> |                |
| 14  | SI.MKN.04259              | fatty acid synthase                                   | SiJWC07ADW_pcr_1                                      | 0.86                          | <b>1.77</b> | <b>1.51</b> | 0.275        | < <b>0.001</b> | < <b>0.001</b> |                |
| 15  | SI.MKN.00197 <sup>2</sup> | <b>fatty acid synthase</b>                            | SiJWF04ADN_pcr_1                                      | <b>0.66</b>                   | <b>0.70</b> | <b>0.46</b> | <b>0.006</b> | <b>0.001</b>   | < <b>0.001</b> |                |
|     |                           |                                                       | SiJWC09ADF_pcr_1                                      | 0.61                          | 0.72        | <b>0.44</b> | 0.109        | 0.099          | < <b>0.001</b> |                |
| 16  | SI.MKN.03327              | fatty acid synthase                                   | SiJWA03BBE_pcr_1                                      | 1.27                          | <b>0.72</b> | 0.91        | 0.064        | < <b>0.001</b> | 0.302          |                |
|     |                           |                                                       | SiJWA10BAE_pcr_1                                      | 0.95                          | <b>2.50</b> | <b>2.37</b> | 0.803        | < <b>0.001</b> | < <b>0.001</b> |                |
|     |                           |                                                       | SiJWH04BBA_pcr_1                                      | 1.00                          | <b>1.75</b> | <b>1.75</b> | 0.985        | < <b>0.001</b> | < <b>0.001</b> |                |
|     |                           |                                                       | SiJWG12BCN_pcr_1                                      | 0.72                          | <b>0.51</b> | <b>0.37</b> | 0.098        | < <b>0.001</b> | < <b>0.001</b> |                |
| 17  | SI.MKN.00095              | fatty acyl-reductase 1                                | SiJWC07ABC_pcr_2                                      | 1.26                          | <b>0.44</b> | <b>0.56</b> | 0.560        | < <b>0.001</b> | <b>0.009</b>   |                |
| 18  | SI.MKN.03476              | fatty acyl-reductase cg5065-like                      | SiJWA12ADF_pcr_1                                      | 0.97                          | <b>2.61</b> | <b>2.54</b> | 0.930        | < <b>0.001</b> | < <b>0.001</b> |                |
| 19  | SI.MKN.01301 <sup>3</sup> | fatty-acid amide hydrolase 2 (possible transcript1)   | SiJWE10BBR_pcr_1                                      | 0.96                          | <b>0.65</b> | <b>0.62</b> | 0.832        | < <b>0.001</b> | < <b>0.001</b> |                |
|     |                           |                                                       | fatty-acid amide hydrolase 2 (possible transcript2)   | SiJWF02AAG_pcr_2              | 0.95        | <b>0.72</b> | <b>0.69</b>  | 0.800          | < <b>0.001</b> | < <b>0.001</b> |
|     |                           |                                                       | fatty-acid amide hydrolase 2 (possible transcript2)   | SiJWA07AAE_pcr_2              | 0.92        | <b>0.64</b> | <b>0.59</b>  | 0.703          | < <b>0.001</b> | < <b>0.001</b> |
| 20  | SI.MKN.00856              | long-chain-fatty-acid coa ligase                      | SiJWD03ABH_pcr_2                                      | 0.73                          | 0.97        | <b>0.71</b> | 0.087        | 0.832          | <b>0.004</b>   |                |
|     |                           |                                                       | SiJWG12ADU_pcr_1                                      | 0.93                          | <b>0.45</b> | <b>0.42</b> | 0.746        | < <b>0.001</b> | < <b>0.001</b> |                |
|     |                           |                                                       | SiJWD07ACW_pcr_2                                      | 0.90                          | <b>0.58</b> | <b>0.52</b> | 0.817        | <b>0.009</b>   | <b>0.002</b>   |                |
| 21  | SI.MKN.02780 <sup>3</sup> | long-chain-fatty-acid ligase 3 (possible transcript1) | SiJWD11BAL_pcr_2                                      | 1.34                          | <b>1.61</b> | <b>2.16</b> | 0.243        | <b>0.003</b>   | < <b>0.001</b> |                |
|     |                           |                                                       | long-chain-fatty-acid ligase 3 (possible transcript2) | SiJWH06ABK_pcr_2              | 1.37        | <b>1.91</b> | <b>2.61</b>  | 0.257          | < <b>0.001</b> | < <b>0.001</b> |
|     |                           |                                                       | long-chain-fatty-acid ligase 3 (possible transcript2) | SiJWA10ABR_pcr_2              | 1.08        | <b>0.41</b> | <b>0.44</b>  | 0.824          | < <b>0.001</b> | < <b>0.001</b> |
| 22  | SI.MKN.01188              | cytochrome p450                                       | SiJWH06ABH_pcr_2                                      | 0.99                          | <b>0.63</b> | <b>0.62</b> | 0.981        | < <b>0.001</b> | < <b>0.001</b> |                |
|     |                           |                                                       | SiJWC03BCF_pcr_1                                      | 0.99                          | <b>1.30</b> | <b>1.29</b> | 0.970        | <b>0.006</b>   | <b>0.008</b>   |                |
| 23  | SI.MKN.04072              | cytochrome p450                                       | SiJWF12BCR_pcr_1                                      | 0.89                          | <b>2.34</b> | <b>2.09</b> | 0.771        | < <b>0.001</b> | < <b>0.001</b> |                |
| 24  | SI.MKN.04463              | cytochrome P450                                       | SiJWB04BCA_pcr_1                                      | 1.01                          | <b>0.44</b> | <b>0.44</b> | 0.982        | < <b>0.001</b> | < <b>0.001</b> |                |
| 25  | SI.MKN.04572              | cytochrome P450                                       | SiJWD04ABB_pcr_2                                      | 0.63                          | <b>0.52</b> | <b>0.33</b> | 0.104        | < <b>0.001</b> | < <b>0.001</b> |                |
| 26  | SI.MKN.00079              | cytochrome p450 4c1                                   | SiJWE01BEA_pcr_2                                      | 0.64                          | 0.86        | <b>0.55</b> | 0.063        | 0.369          | < <b>0.001</b> |                |
|     |                           |                                                       | SiJWH09ACV_pcr_2                                      | 1.12                          | <b>1.75</b> | <b>1.96</b> | 0.703        | < <b>0.001</b> | < <b>0.001</b> |                |
| 27  | SI.MKN.00426              | cytochrome p450 4c1                                   | SiJWC07BBR_pcr_1                                      | 1.44                          | <b>0.57</b> | 0.82        | 0.119        | < <b>0.001</b> | 0.178          |                |
|     |                           |                                                       | SiJWE11CAR_pcr_1                                      | 0.88                          | <b>0.54</b> | <b>0.48</b> | 0.655        | < <b>0.001</b> | < <b>0.001</b> |                |

<sup>1</sup> Expression ratio for the first category relative to the second category, dM = diploid male, hM = haploid male, Qn = queen.

<sup>2</sup> Genes that were both ploidy- and sex-specific.

<sup>3</sup> Possible alternatively spliced variants.



**Table S8.** (Continued)

| No. | gene ID      | description                                         | spot ID          | expression ratio <sup>1</sup> |             |             | <i>p</i> -value |                   |                   |
|-----|--------------|-----------------------------------------------------|------------------|-------------------------------|-------------|-------------|-----------------|-------------------|-------------------|
|     |              |                                                     |                  | dM/Qn                         | hM/dM       | hM/Qn       | Qn-dM           | dM-hM             | hM-Qn             |
| 29  | SI.MKN.02054 | cytochrome p450 4c1                                 | SiJWE03ABR_per_2 | 0.78                          | <b>0.63</b> | <b>0.49</b> | 0.407           | <b>0.011</b>      | <b>&lt; 0.001</b> |
|     |              |                                                     | SiJWH11ACV_per_2 | 0.86                          | <b>0.56</b> | <b>0.48</b> | 0.672           | <b>0.002</b>      | <b>&lt; 0.001</b> |
| 30  | SI.MKN.04318 | cytochrome p450 4c1                                 | SiJWB02BBZ_per_1 | 0.84                          | <b>0.59</b> | <b>0.49</b> | 0.546           | <b>0.002</b>      | <b>&lt; 0.001</b> |
| 31  | SI.MKN.04334 | cytochrome p450 4c1                                 | SiJWH08BCX_per_1 | 1.00                          | <b>0.69</b> | <b>0.69</b> | 0.996           | <b>0.007</b>      | <b>0.008</b>      |
| 32  | SI.MKN.05047 | cytochrome P450 4C1                                 | SiJWD12BBE_per_1 | 0.96                          | <b>1.47</b> | <b>1.41</b> | 0.896           | <b>0.002</b>      | <b>0.005</b>      |
| 33  | SI.MKN.02795 | cytochrome p450 4g15                                | SiJWE06ABI_per_2 | 1.08                          | <b>5.61</b> | <b>6.05</b> | 0.730           | <b>&lt; 0.001</b> | <b>&lt; 0.001</b> |
|     |              |                                                     | SiJWE09ACN_per_2 | 0.89                          | <b>3.49</b> | <b>3.09</b> | 0.694           | <b>&lt; 0.001</b> | <b>&lt; 0.001</b> |
|     |              |                                                     | SiJWF04BAD_per_1 | 0.90                          | <b>4.33</b> | <b>3.88</b> | 0.759           | <b>&lt; 0.001</b> | <b>&lt; 0.001</b> |
|     |              |                                                     | SiJWB05ADH_per_1 | 1.10                          | <b>0.68</b> | 0.75        | 0.668           | <b>0.001</b>      | 0.013             |
| 34  | SI.MKN.00599 | cytochrome p450 6k1-like                            | SiJWA10AAK_per_2 | 1.18                          | <b>1.58</b> | <b>1.86</b> | 0.536           | <b>0.002</b>      | <b>&lt; 0.001</b> |
| 35  | SI.MKN.04264 | cytochrome p450 6k1-like                            | SiJWB02AAG_per_2 | 0.93                          | <b>2.04</b> | <b>1.90</b> | 0.851           | <b>&lt; 0.001</b> | <b>&lt; 0.001</b> |
| 36  | SI.MKN.00844 | cytochrome p450 6a1; 6a2-like                       | SiJWA01CAH_per_1 | 0.93                          | <b>3.61</b> | <b>3.37</b> | 0.744           | <b>&lt; 0.001</b> | <b>&lt; 0.001</b> |
|     |              |                                                     | SiJWE05ADV_per_1 | <b>1.65</b>                   | <b>0.49</b> | 0.82        | <b>0.004</b>    | <b>&lt; 0.001</b> | 0.097             |
| 37  | SI.MKN.01627 | probable cytochrome p450 6a13                       | SiJWA11BCJ_per_1 | 0.96                          | <b>1.65</b> | <b>1.59</b> | 0.936           | <b>0.003</b>      | <b>0.006</b>      |
| 38  | SI.MKN.04965 | cytochrome P450 9e2electron carrier activity        | SiJWB01AAC_per_1 | 0.81                          | <b>0.45</b> | <b>0.36</b> | 0.500           | <b>&lt; 0.001</b> | <b>&lt; 0.001</b> |
|     |              |                                                     | SiJWB01AAC_per_2 | 0.81                          | <b>0.54</b> | <b>0.44</b> | 0.430           | <b>&lt; 0.001</b> | <b>&lt; 0.001</b> |
| 39  | SI.MKN.03889 | nadph-cytochrome p450 reductase                     | SiJWC01ACM_per_2 | 1.01                          | <b>0.54</b> | <b>0.54</b> | 0.982           | <b>&lt; 0.001</b> | <b>&lt; 0.001</b> |
|     |              |                                                     | SiJWE03ABW_per_2 | 1.00                          | <b>0.65</b> | <b>0.65</b> | 0.995           | <b>&lt; 0.001</b> | <b>&lt; 0.001</b> |
|     |              |                                                     | SiJWG12CAX_per_1 | 1.04                          | <b>0.60</b> | <b>0.63</b> | 0.847           | <b>&lt; 0.001</b> | <b>&lt; 0.001</b> |
|     |              |                                                     | SiJWH02BAB_per_1 | 0.91                          | <b>0.56</b> | <b>0.51</b> | 0.532           | <b>&lt; 0.001</b> | <b>&lt; 0.001</b> |
|     |              |                                                     | SiJWH10CAX_per_1 | 1.04                          | <b>0.51</b> | <b>0.53</b> | 0.859           | <b>&lt; 0.001</b> | <b>&lt; 0.001</b> |
|     |              |                                                     | SiJWA03ABL_per_2 | 0.99                          | <b>0.73</b> | <b>0.73</b> | 0.988           | <b>0.005</b>      | <b>0.004</b>      |
| 40  | SI.MKN.04671 | odorant binding protein SiOBP1                      | SiJWA08ABR_per_2 | 0.93                          | <b>0.41</b> | <b>0.38</b> | 0.858           | <b>&lt; 0.001</b> | <b>&lt; 0.001</b> |
|     |              |                                                     | SiJWD04CAE_per_1 | 0.98                          | <b>0.47</b> | <b>0.46</b> | 0.952           | <b>&lt; 0.001</b> | <b>&lt; 0.001</b> |
|     |              |                                                     | SiJWD11BBJ_per_1 | 1.08                          | <b>0.38</b> | <b>0.41</b> | 0.883           | <b>&lt; 0.001</b> | <b>&lt; 0.001</b> |
|     |              |                                                     | SiJWF11BCW_per_1 | 0.92                          | <b>0.44</b> | <b>0.40</b> | 0.699           | <b>&lt; 0.001</b> | <b>&lt; 0.001</b> |
| 42  | SI.MKN.00700 | odorant binding protein SiOBP13                     | SiJWA03ACS_per_1 | 1.01                          | <b>0.69</b> | <b>0.70</b> | 0.965           | <b>&lt; 0.001</b> | <b>&lt; 0.001</b> |
| 43  | SI.MKN.05034 | odorant binding protein SiOBP10                     | SiJWD07ABA_per_2 | 1.18                          | <b>0.47</b> | <b>0.55</b> | 0.364           | <b>&lt; 0.001</b> | <b>&lt; 0.001</b> |
| 44  | SI.MKN.04549 | chemosensory protein                                | SiJWF11BCE_per_1 | 0.92                          | <b>0.58</b> | <b>0.53</b> | 0.778           | <b>&lt; 0.001</b> | <b>&lt; 0.001</b> |
| 45  | SI.MKN.04697 | chemosensory protein SiCSP2                         | SiJWA03BCG_per_1 | 0.94                          | <b>0.61</b> | <b>0.58</b> | 0.888           | <b>0.007</b>      | <b>0.003</b>      |
| 46  | SI.MKN.00127 | sol s 2 allergen                                    | SiJWD02BAY_per_1 | 1.02                          | <b>1.42</b> | <b>1.45</b> | 0.952           | <b>0.005</b>      | <b>0.003</b>      |
| 47  | SI.MKN.00134 | protein g12; contains allergen domain               | SiJWF02ABD_per_2 | 1.01                          | <b>3.06</b> | <b>3.09</b> | 0.976           | <b>&lt; 0.001</b> | <b>&lt; 0.001</b> |
| 48  | SI.MKN.04507 | obstructor C1 (peritrophin), chitin binding protein | SiJWH04BCY_per_1 | 0.95                          | <b>0.31</b> | <b>0.29</b> | 0.936           | <b>&lt; 0.001</b> | <b>&lt; 0.001</b> |
| 49  | SI.MKN.04650 | chemosensory protein SiCSP6                         | SiJWH07ABA_per_2 | 1.07                          | <b>2.72</b> | <b>2.90</b> | 0.836           | <b>&lt; 0.001</b> | <b>&lt; 0.001</b> |

<sup>1</sup> Expression ratio for the first category relative to the second category, dM = diploid male, hM = haploid male, Qn = queen.

<sup>2</sup> Genes that were both ploidy- and sex-specific.

<sup>3</sup> Possible alternatively spliced variants.

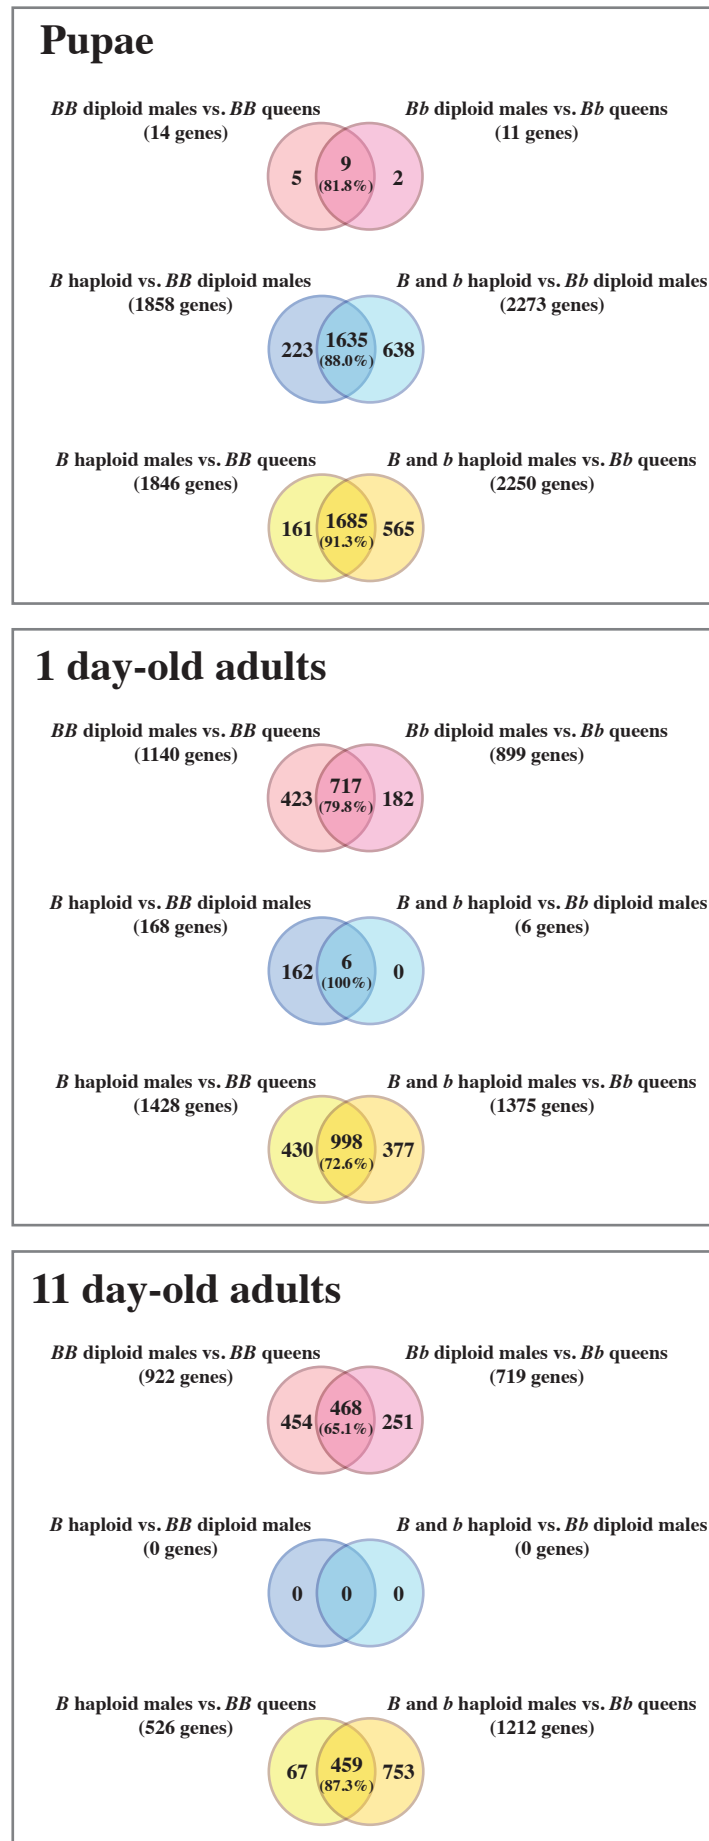

**Figure S1.** Venn diagram showing the numbers of genes differentially expressed between *S. invicta* individuals of different categories with different *Gp-9* genotypes. Because haploid males can have either the *B* or *b* genotype, we compared both types of males to *Bb* diploid individuals.

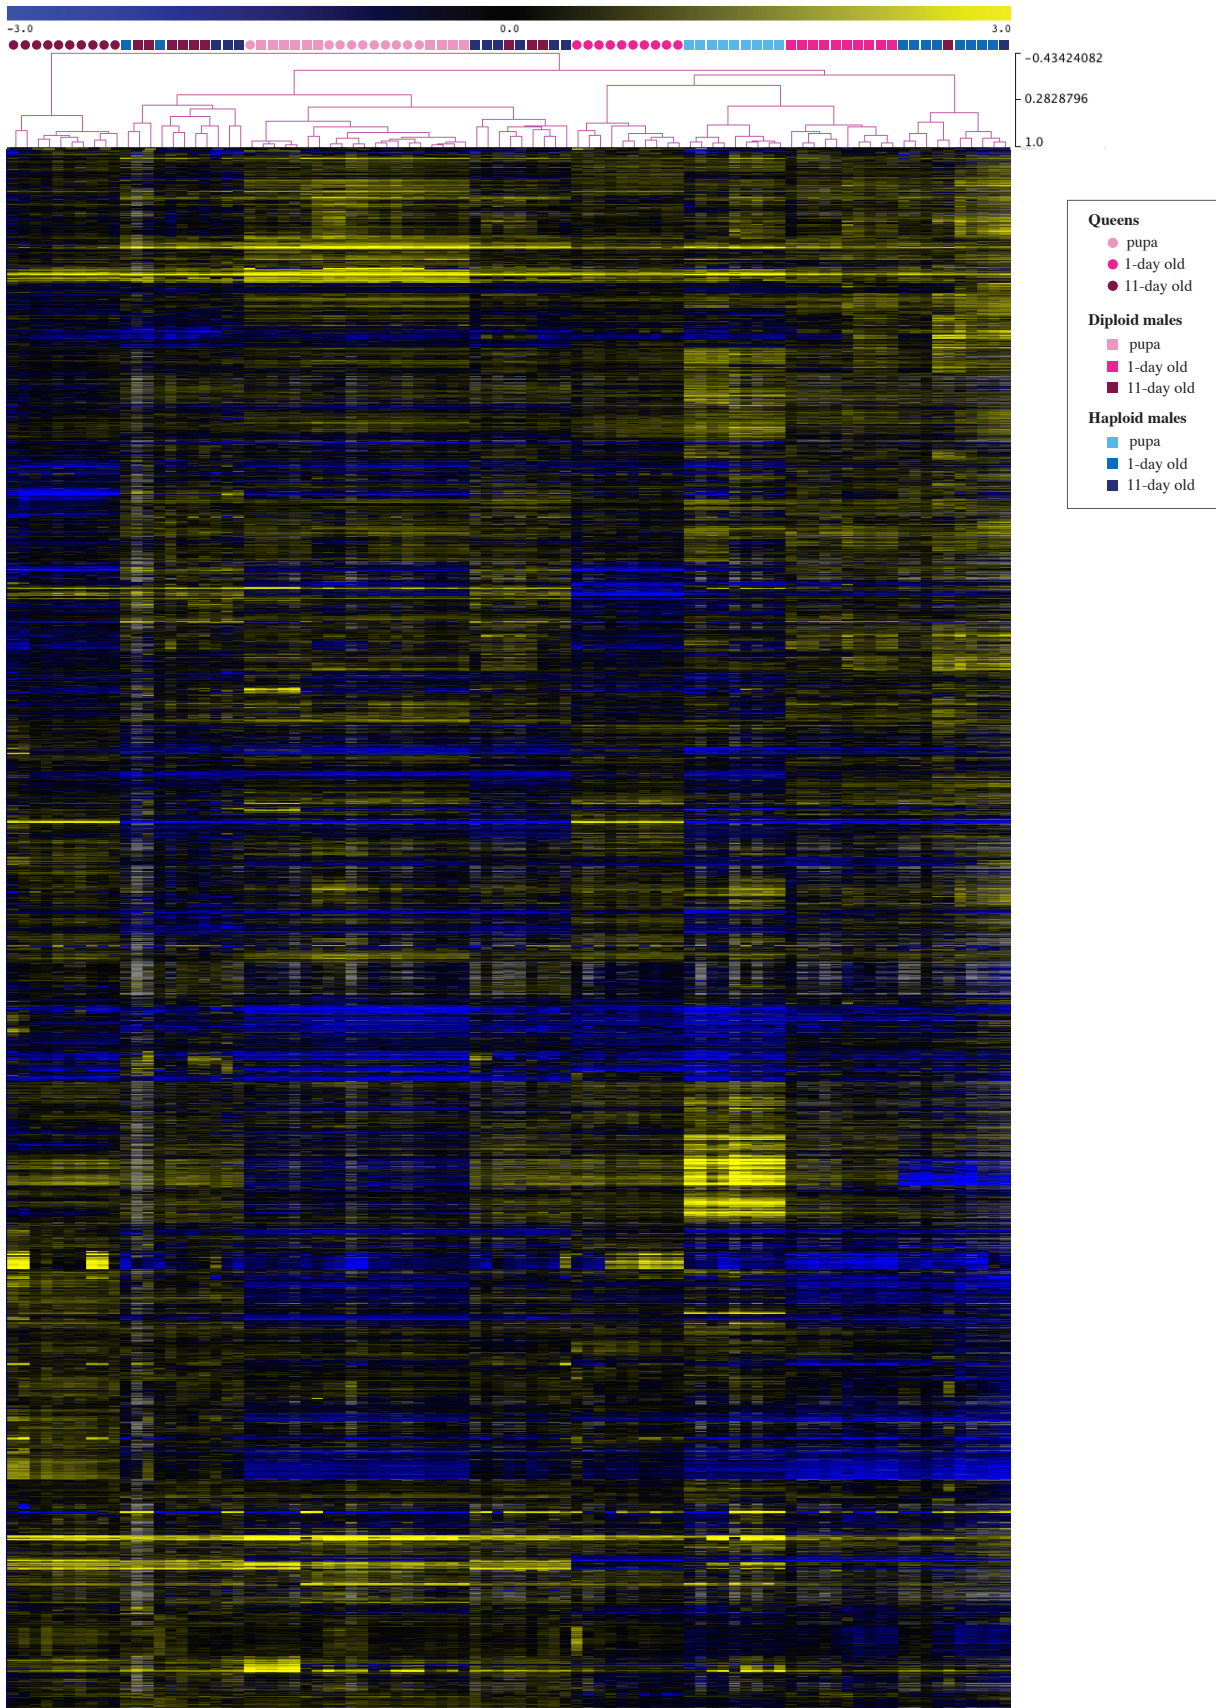

**Figure S2 Hierarchical clustering of gene expression profiles of individual queens, diploid males and haploid males at three developmental timepoints in *S. invicta*.** Colors in the heat map represent relative levels of expression: blue=highly expressed, yellow=lowly expressed, gray = NA (data not available). Numbers for heat map are log<sub>2</sub> transformed relative expression levels. Scale bar on the right of the cluster represents an index of similarity between samples.

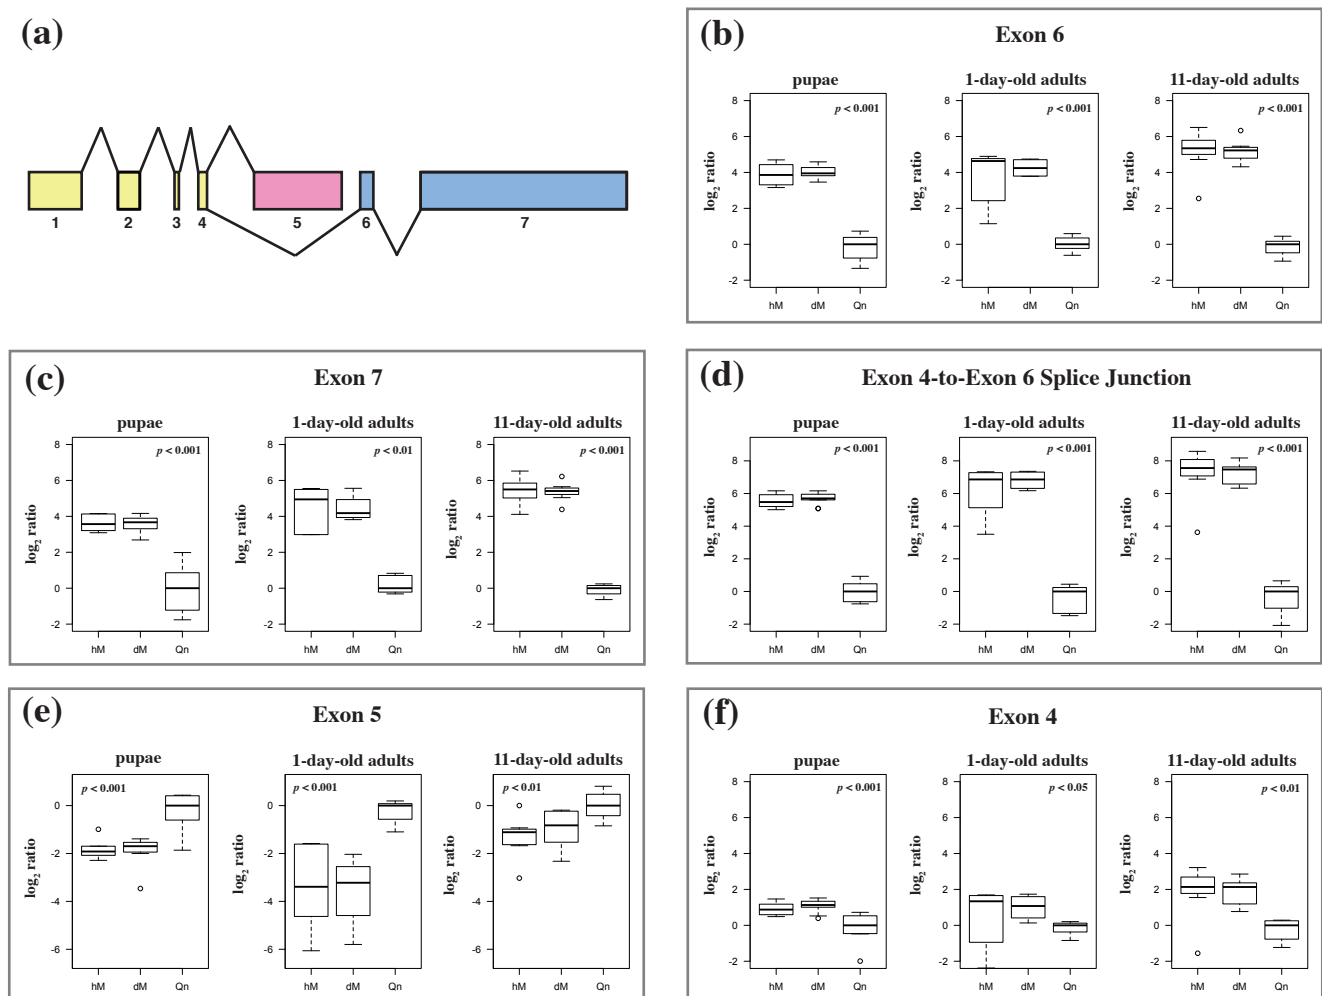

**Figure S3. Alternative splicing of the *S. invicta dsx* gene in pupae.** (a) Diagram depicting alternative splicing pattern of *dsx* (black, pattern for both sexes; gray, queen pattern; vertical stripe, male pattern). (b-f) Box-and-whisker plots of  $\log_2$  transformed relative expression levels based on qRT-PCR analysis: the top and bottom of the box are the first and third quartiles, respectively; the horizontal bar within the box is the median, whiskers extend from the box to the most extreme value within  $1.5\times$  of the interquartile range of the box; data beyond the whiskers are outliers plotted as points. Abbreviations for categories of individuals: hM = haploid males, dM = diploid males, Qn = queens. *P*-values indicate significance of variation in expression levels among individuals of different categories at each timepoint (ANOVA). (b) Exon 6, (c) Exon 7, (d) direct Exon 4-to-Exon 6 splice junction, (e) Exon 5, and (f) Exon 4.

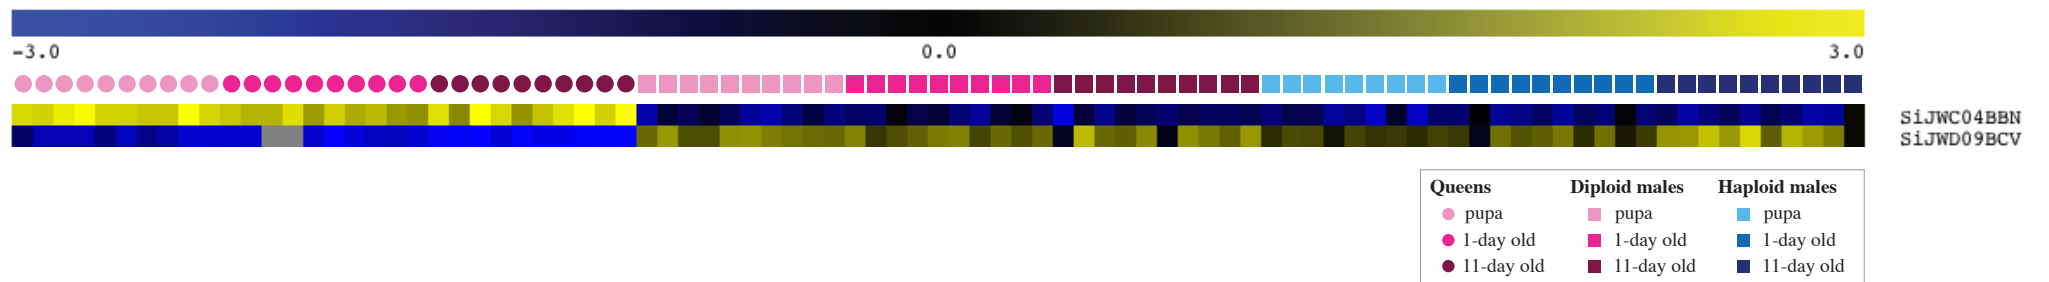

**Figure S4. Hierarchical clustering of the two *dsx* microarray spots at three developmental timepoints in *S. invicta*.** Colors in the heat maps represent relative levels of expression: blue=highly expressed, yellow=lowly expressed, gray = NA (data not available). Numbers are  $\log_2$  transformed relative expression levels.

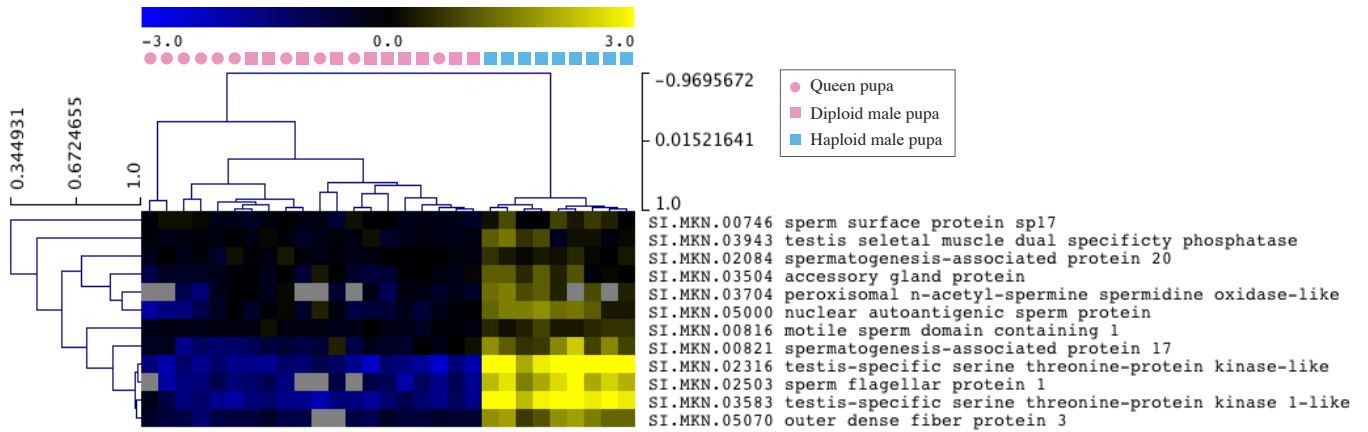

**Figure S5. Hierarchical clustering of genes implicated in sperm production in *S. invicta* pupae.** Each row in the heat map represents a gene and each column represents an individual sample. Colors in the heat maps represent relative levels of expression: blue = highly expressed, yellow = lowly expressed, gray = NA. Numbers are  $\log_2$  transformed relative expression levels. Scale bars of the dendrograms represent an index of similarity between samples and between genes.

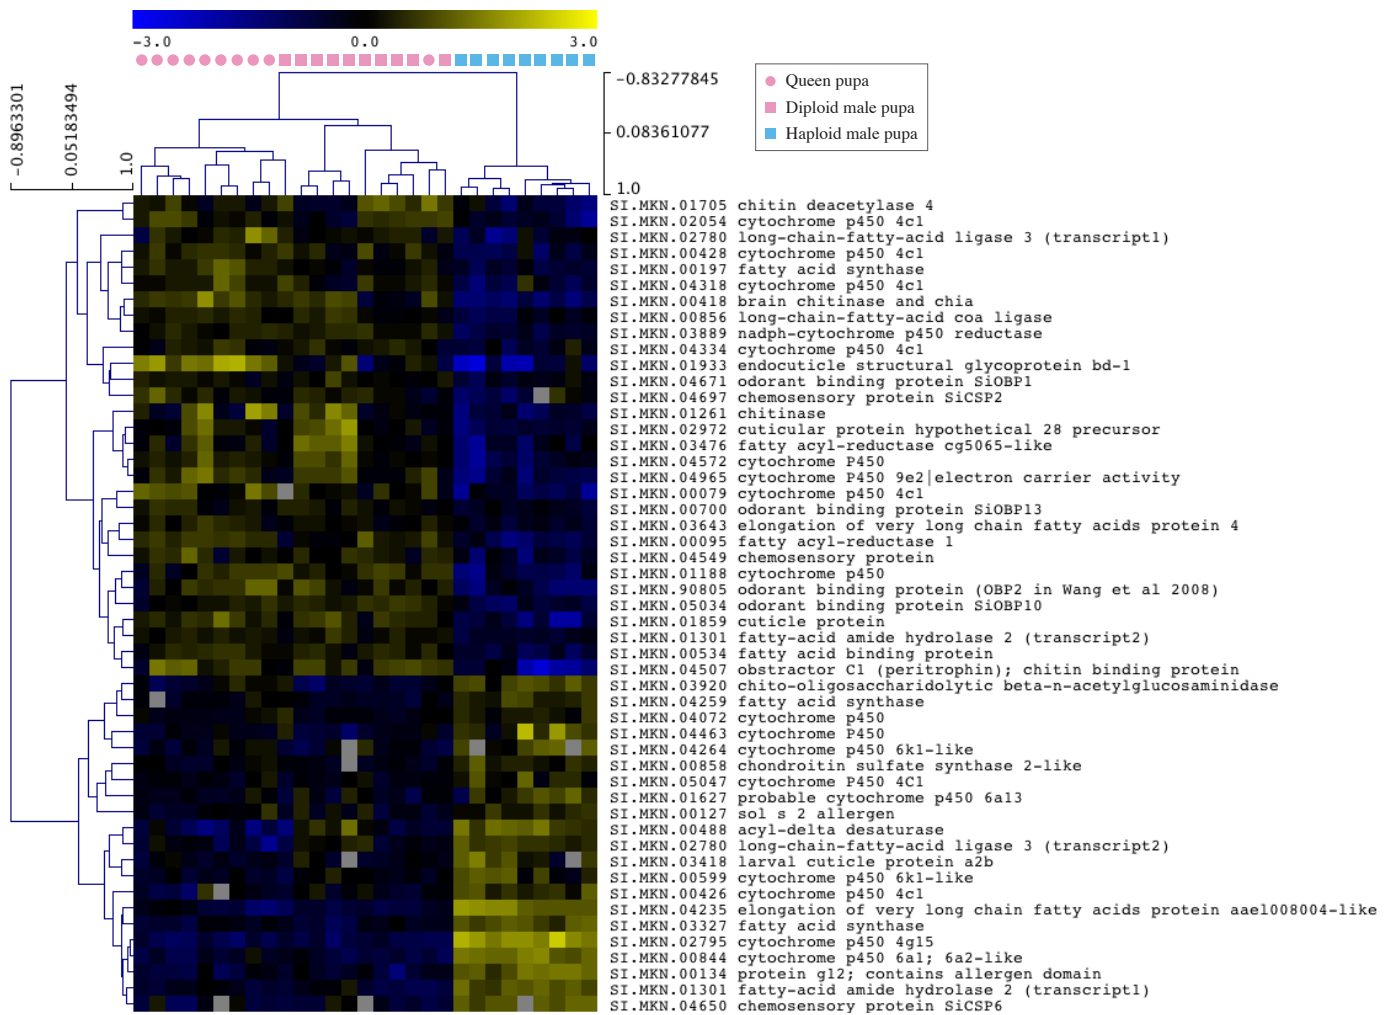

**Figure S6. Hierarchical clustering of genes implicated in pheromone production/perception in *S. invicta* pupae.** Each row in the heat map represents a gene and each column represents an individual sample. Colors in the heat maps represent relative levels of expression: blue = highly expressed, yellow = lowly expressed, gray = NA. Numbers are  $\log_2$  transformed relative expression levels. Scale bars of the dendrograms represent indices of similarity between samples and between genes.

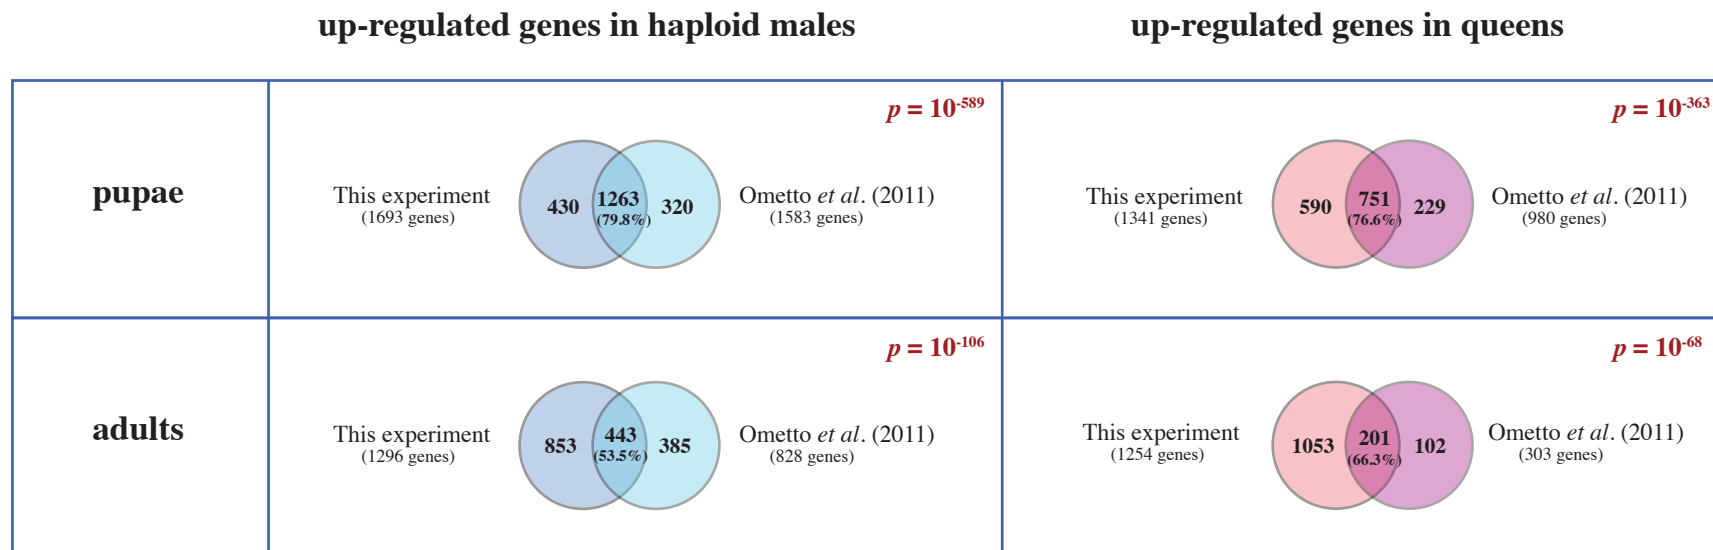

**Figure S7. Venn diagram showing number of up-regulated genes in *S. invicta* haploid males and queens at three developmental time-points in this study and in Ometto *et al.* (2011).** Percentages in the intersection areas are relative to Ometto *et al.* (2011). Hypergeometric tests ( $p$ -values given in each of the four panels) revealed good concordance between the two studies with genes being overexpressed in one study being greatly overrepresented among the genes differently expressed in the other study. Note that adults used for this comparison in our study were 1-day old, whereas in Ometto *et al.* (2011) they were 1h after eclosion.
